# Supplementary material for: Expression profiles of four BES1/BZR1 homologous genes encoding bHLH transcription factors in Arabidopsis
Source: PubMed Central journal article supplement — J Pestic Sci. 2020 May 20;45(2):95–104. doi: 10.1584/jpestics.D20-001 (PMC7251199; doi:10.1584/jpestics.d20-001), 2020-05-20
Supplement: jps-45-2-D20-001_s001.pdf [file jps-45-2-D20-001_s001.pdf]

# Journal of Pesticide Science

supplementary materials

DOI:10.1584/jpestics.D20-001

## **Expression Profiles of Four *BES1/BZR1* Homologous Genes Encoding bHLH Transcription Factors in *Arabidopsis***

Yui OTANI, Yusuke TOMONAGA, Kenya TOKUSHIGE, Miyu KAMIMURA,  
Azusa SASAKI, Yasushi NAKAMURA, Takako NAKAMURA,  
Tomoaki MATSUO and Shigehisa OKAMOTO

Pesticide Science Society of Japan

*<http://pssj2.jp/eng/>*

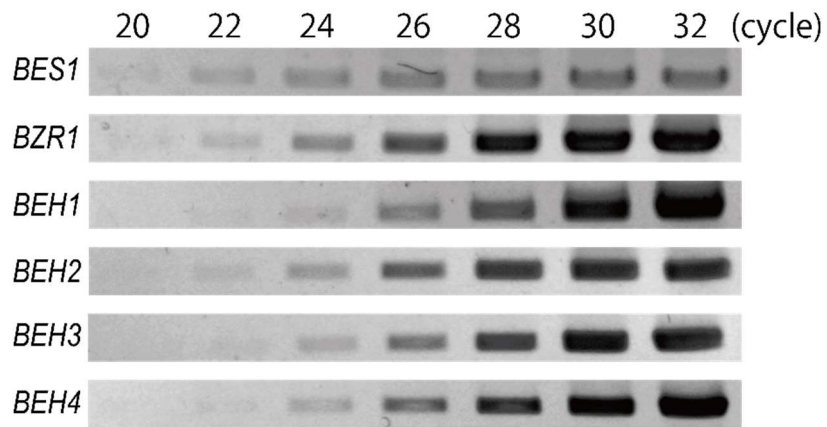

**Supplemental Fig. S1: Expression levels of *BES1/BZR1* family members at an early growth stage**

Total RNAs prepared from 2-wk wild-type *Arabidopsis* seedlings were subjected to semi-RT-PCR with cycles of 20, 22, 24, 26, 28, 30, and 32 for rough comparison of mRNA levels between six *BES1/BZR1* family members. The PCR products were separated electrophoretically on 0.7% agarose gel and visualized using ethidium bromide. Similar results were obtained from biologically triplicated experiments, one of which is depicted in this figure.

Supplemental Table S1. BRRE, E-box and G-box elements for BR response found in *BEH1* and *BEH2* promoter

| gene        | element             | location from TSS <sup>a)</sup> |        | sequence (5'-3')    |
|-------------|---------------------|---------------------------------|--------|---------------------|
|             |                     | (start)                         | (end)  |                     |
| <i>BEH1</i> | E-box L1            | -1528                           | -1523  | CAGATG              |
|             | E-box L2            | -800                            | -795   | CATCTG              |
|             | E-box L3            | -738                            | -733   | CAAATG              |
|             | E-box L4            | -604                            | -599   | CACATG              |
|             | E-box L5 / G-box L1 | -427                            | -422   | CACGTG              |
|             | BRRE L1 / G-box L2  | -359                            | -352   | caCGTGCG / CACGTGcg |
|             | E-box L6 / G-box L2 | -357                            | -352   | CACGTG              |
|             | BRRE L2 / G-box L2  | -357                            | -350   | caCGTGTG / CACGTGtg |
|             | E-box L7            | -181                            | -176   | CAAATG              |
| E-box L8    | -29                 | -24                             | CAGATG |                     |
| <i>BEH2</i> | BRRE L1             | -1170                           | -1165  | CGTGCG              |
|             | E-box L1 / G-box L1 | -1060                           | -1055  | CACGTG              |
|             | E-box L2            | -887                            | -882   | CATTTG              |
|             | E-box L3            | -864                            | -859   | CAAATG              |
|             | E-box L4            | -739                            | -734   | CAGCTG              |
|             | BRRE L2 / G-box L2  | -692                            | -685   | caCGTGCG / CACGTGcg |
|             | E-box L5 / G-box L2 | -690                            | -685   | CACGTG              |
|             | BRRE L3             | -135                            | -130   | CGTGCG              |
|             | E-box L6 / G-box L3 | -115                            | -110   | CACGTG              |
|             | BRRE L4 / G-box L4  | -82                             | -75    | caCGTGTG / CACGTGtg |
|             | E-box L7 / G-box L4 | -80                             | -75    | CACGTG              |
|             | BRRE L5 / G-box L5  | -63                             | -56    | caCGTGTG / CACGTGtg |
|             | E-box L8 / G-box L5 | -61                             | -56    | CACGTG              |
|             | BRRE L6 / G-box L5  | -61                             | -54    | caCGTGTG / CACGTGtg |
|             | E-box L9            | -49                             | -44    | CAAATG              |
| BRRE L7     | 89                  | 94                              | CGTGCG |                     |

<sup>a)</sup> TSS; transcription start site
